# Supplementary material for: Early warning system for ice collapses and river blockages in the Sedongpu Valley, southeastern Tibetan Plateau
Source: Copernicus journal article supplement (doi:10.5194/nhess-23-3015-2023), 2023-09-08
Supplement: Supplementary file [file nhess-23-3015-2023-supplement.pdf]

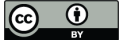

*Supplement of*

## **Early warning system for ice collapses and river blockages in the Sedongpu Valley, southeastern Tibetan Plateau**

**Wei Yang et al.**

*Correspondence to:* Baosheng An (anbaosheng@itpcas.ac.cn) and Wei Yang (yangww@itpcas.ac.cn)

The copyright of individual parts of the supplement might differ from the article licence.

1

2

### 3 Supplement

4

5

6

7

8

9

10

11

12

13

14

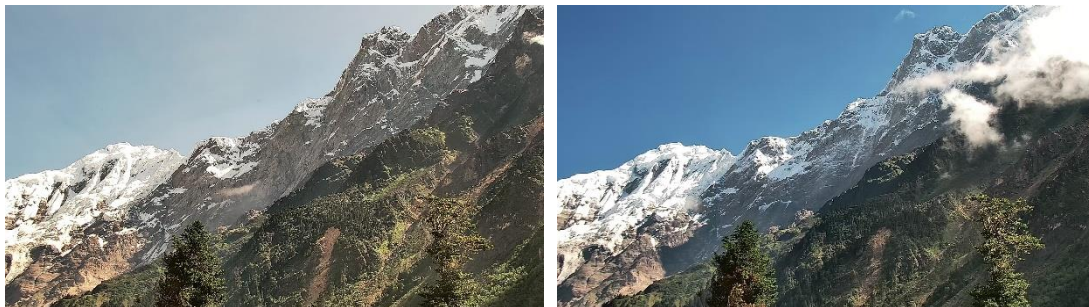

15

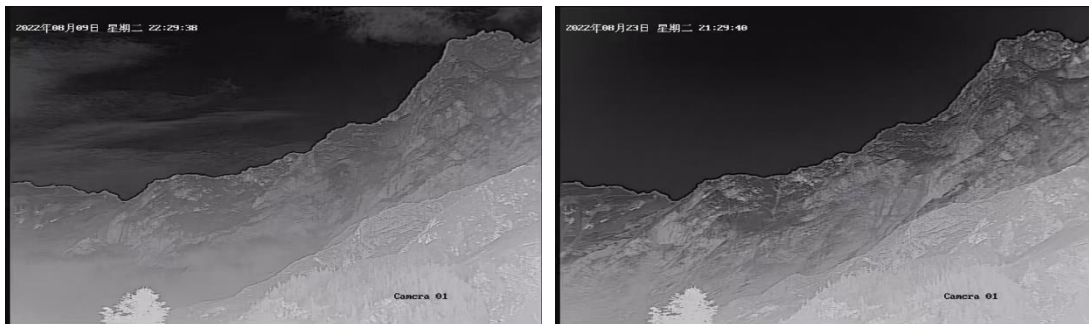

16

17 **Figure S1.** Optical photos taken on 15 July and 22 August (top) and thermal photos taken on 9  
18 August and 23 August (bottom) showing the topographic changes before and after the collapses  
19 occurring on 11 August 2022.

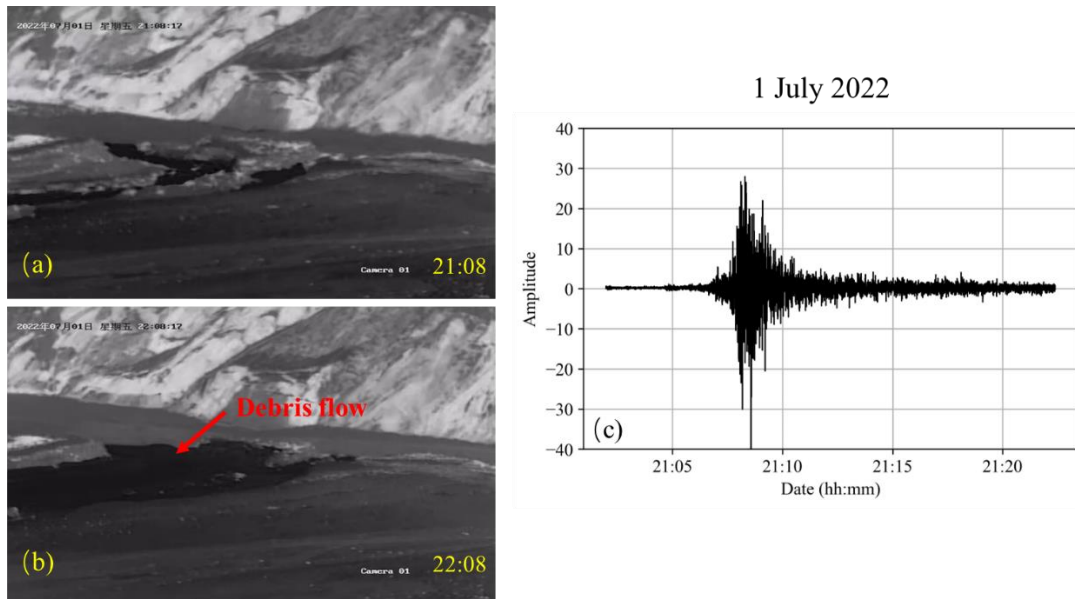

20  
21  
22  
23  
24  
25

**Figure S2.** Comparison of images showing the occurrence of debris flows at the Sedongpu Valley outlet (a, b) and the collapse-induced seismic waveform on 1 July 2022, where the maximum amplitude of the geophone waveform was greater than 20 (c).

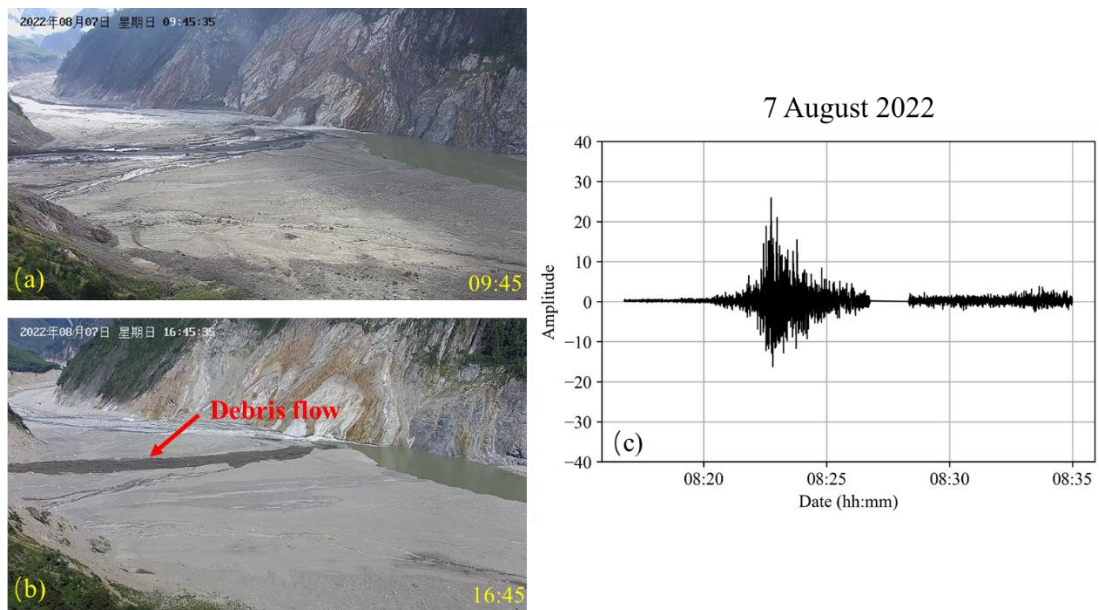

26  
27  
28  
29

**Figure S3.** Similar to above, but on 7 August 2022.

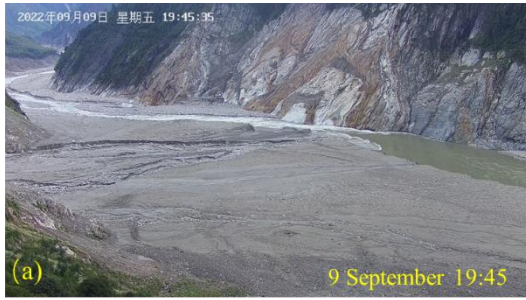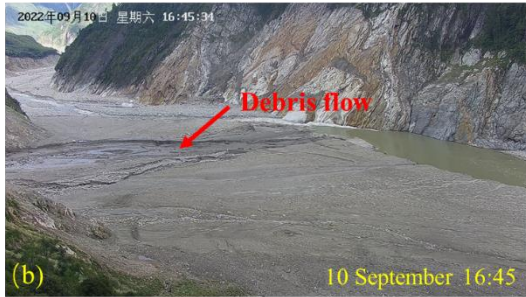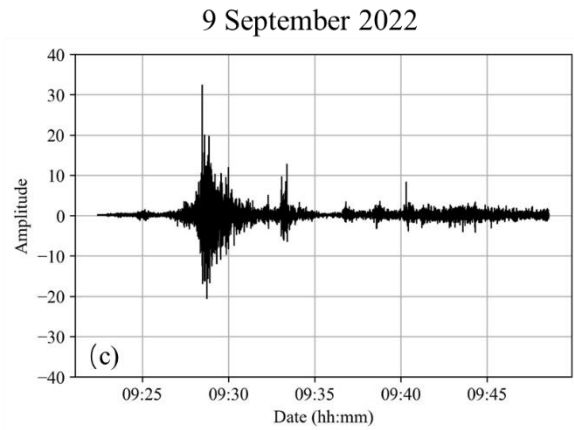

30

31 **Figure S4.** Similar to above, but on 9 September 2022.

32

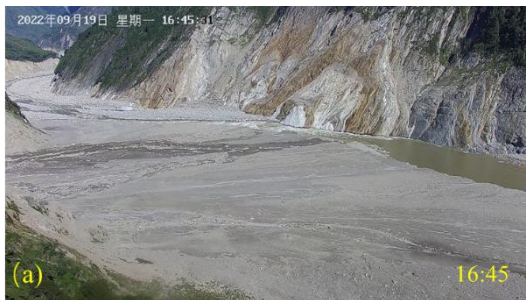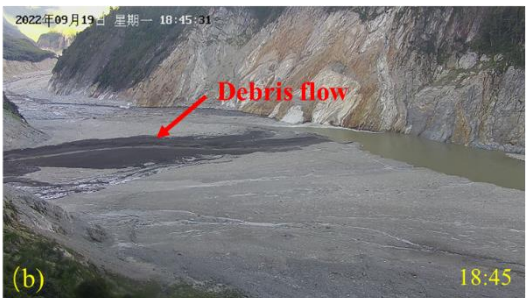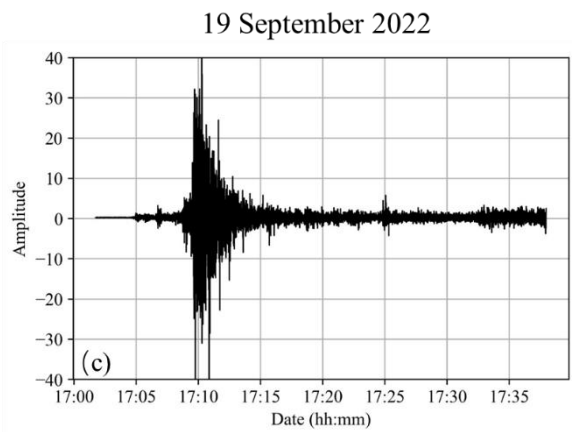

33

34 **Figure S5.** Similar to above, but on 19 September 2022.

35

36

37

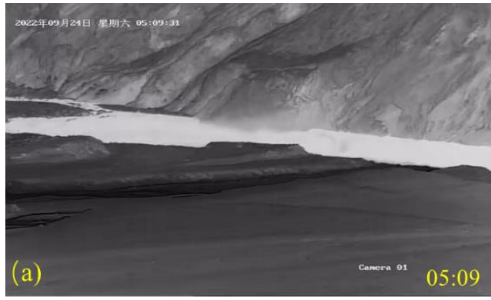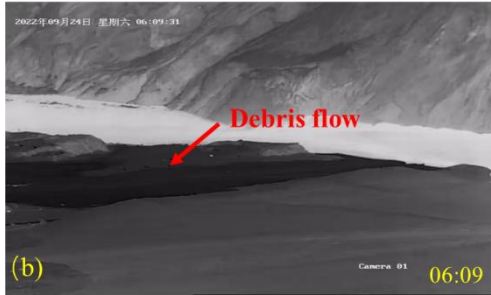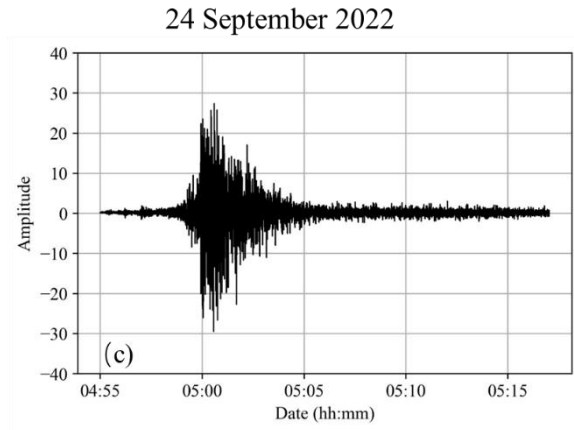

38  
39  
40  
41  
42

**Figure S6.** Similar to above, but on 24 September 2022.

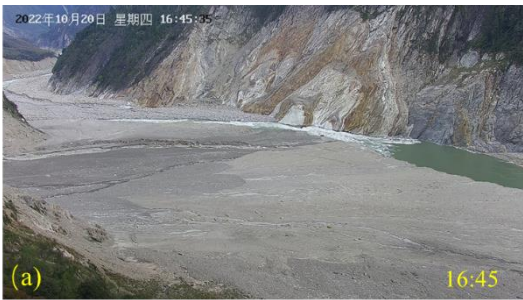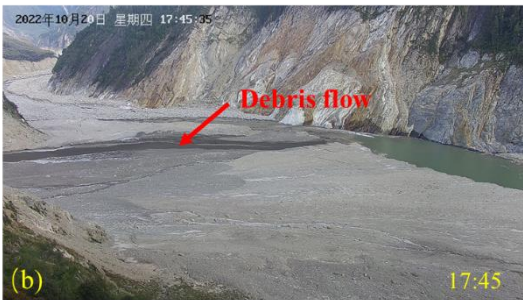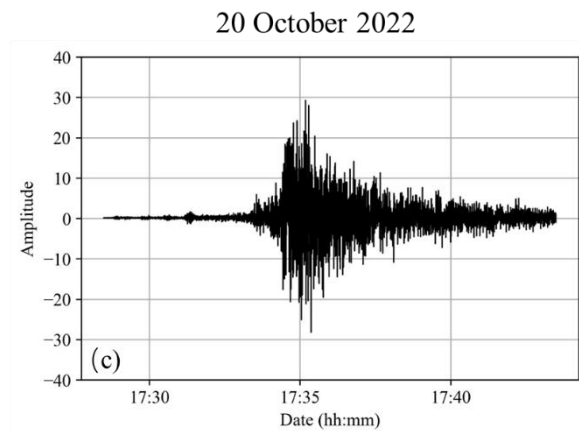

43  
44  
45  
46

**Figure S7.** Similar to above, but on 20 October 2022.

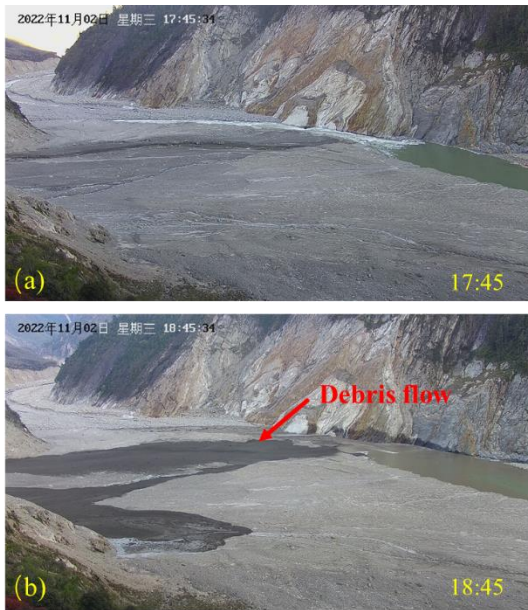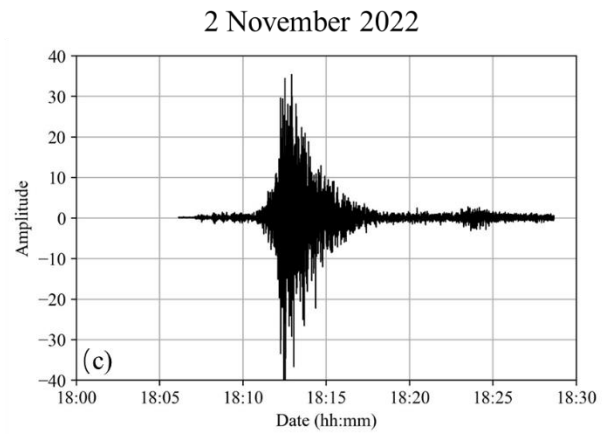

47  
48  
49  
50

**Figure S8.** Similar to above, but on 2 November 2022.

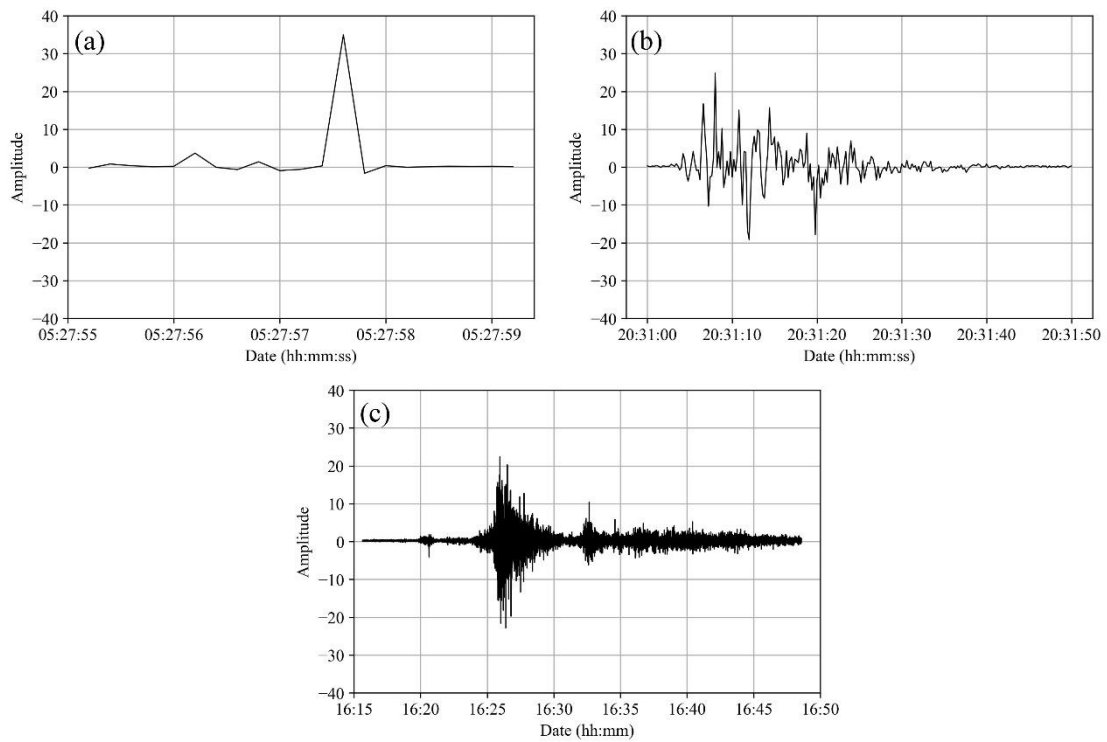

51  
52  
53  
54  
55  
56  
57  
58

**Figure S9.** The two abnormal waveforms occurred on 2 June 2022 (a) and 1 October 2022 (b) and the collapse-induced waveforms occurred on 11 August 2022 (c), showing the different waveform characteristics and duration.

59 **Table S1.** The daily mean values of meteorological factors during the occurrence of ice-rock  
60 collapses in 2022

61

| Collapse<br>Events | Air temperature<br>(°C) | Rainfall<br>(mm) | Wind speed<br>(m/s) | Solar radiation<br>(W/m <sup>2</sup> ) |
|--------------------|-------------------------|------------------|---------------------|----------------------------------------|
| 2022/5/14          | 8.3                     | 22.6             | 0.3                 | 83.9                                   |
| 2022/7/1           | 13.7                    | 0.0              | 0.9                 | 314.0                                  |
| 2022/8/7           | 15.8                    | 2.8              | 0.8                 | 301.0                                  |
| 2022/8/11          | 15.4                    | 0.4              | 0.7                 | 321.1                                  |
| 2022/9/9           | 10.5                    | 6.4              | 0.5                 | 184.3                                  |
| 2022/9/19          | 13.6                    | 0.0              | 0.7                 | 216.6                                  |
| 2022/9/24          | 9.6                     | 9.4              | 0.3                 | 107.3                                  |
| 2022/10/20         | 4.6                     | 0.0              | 0.9                 | 166.8                                  |
| 2022/11/2          | 4.0                     | 0.0              | 1.3                 | 146.4                                  |

62
